# Supplementary material
Source: publisher figshare collection journal article supplement (https://frontiersin.figshare.com/ndownloader/files/25459607)

## Supplementary Material 1. Marine protected areas associated with the projects

Protection levels correspond to general environmental regulation (GER), partial protection (PP), no-take-zone (NTZ) and integral reserve (IR), i.e., a no entry area. ● for participation in general discussion workshops. ● for participation in scientific studies. NC stands for New Caledonia. \* indicates the MPA was not yet officially created at the time of Project 1.

| Region                    | MPA                 | Year declared and/or modified | Overall area (NTZ+IR only) (km <sup>2</sup> ) | Management governance                            | Protection levels in the MPA | Project |   |   |
|---------------------------|---------------------|-------------------------------|-----------------------------------------------|--------------------------------------------------|------------------------------|---------|---|---|
|                           |                     |                               |                                               |                                                  |                              | 1       | 2 | 3 |
| Mediterranean             | Bonifacio           | 1999                          | 790 (12)                                      | Region-managed                                   | GER,PP, NTZ                  | ●       | ● |   |
|                           | Calanques*          | 2012                          | 425 (46)                                      | State-managed                                    | PP, NTZ                      | ○       |   |   |
|                           | Cerbère-Banyuls     | 1974                          | 6.5 (0.65)                                    | District-managed, French Natural Reserve Network | PP, IR                       | ●       | ● | ● |
|                           | Côte Bleue          | 1982 and 1996                 | 98.7 (2.95)                                   | Council-managed, Association with fishers        | PP, NTZ                      | ○       | ● |   |
|                           | Cap Roux            | 2007                          | 4.5                                           | City- and fisher-managed                         | NTZ                          |         | ● |   |
|                           | Cap de Creus        | 1998                          | 30.7                                          | Region-managed                                   | GER, PP, IR                  | ○       |   |   |
| Atlantic                  | Iroise*             | 2007                          | 3,500                                         | State-managed                                    | GER, PP                      | ●       |   |   |
| Indian Ocean              | La Réunion          | 2007                          | 35 (1.97)                                     | Region-managed, French Natural Reserve Network   | PP, NTZ, IR                  |         | ● | ● |
|                           | Mayotte             | 1990, 2007 2010               | 14.6 until 2010, then 684 (14.6)              | State-managed                                    | NTZ<br>PP, NTZ               |         | ● | ● |
| Caribbean                 | St Martin           | 1998                          | 28                                            | State-managed, French Natural Reserve Network    | PP                           |         | ● |   |
| Pacific Ocean, NC         | South Province MPAs | 1970-1998                     | 376 (172)                                     | Province-managed                                 | PP, NTZ, IR                  | ●       | ● | ● |
|                           | North Province MPAs | 2009                          | 43.7                                          | Province-managed                                 | NTZ                          |         |   | ● |
|                           |                     | 2009                          | 70.8 (13)                                     |                                                  | PP, NTZ                      |         |   |   |
|                           |                     | 2014                          | 35.8                                          |                                                  | PP                           |         |   |   |
| World Heritage Properties | 2008                | 15,743                        | Participatory management                      | WH site, buffer zone                             |                              |         | ● |   |
| Coral Sea Marine Park     | 2014                | 1,293,000 (3,100)             | NC government-managed                         | GER, NTZ, IR                                     |                              |         |   | ● |
|                           | 2018                | (28,000)                      |                                               |                                                  |                              |         |   |   |

# Projects 1 and 2

## Côte Bleue Marine Park (1982 -1996)

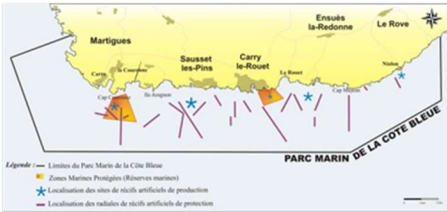

## Natural Reserve of Bonifacio (1999)

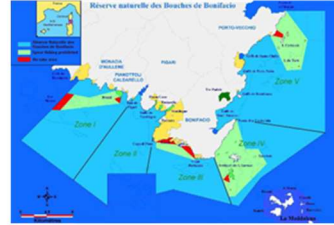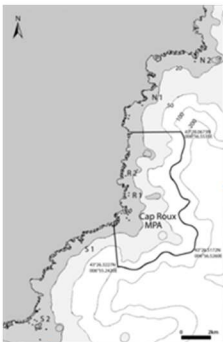

## Fishing closure of Cap Roux (2007)

## Natural Reserve of Cerbère-Banyuls (1974)

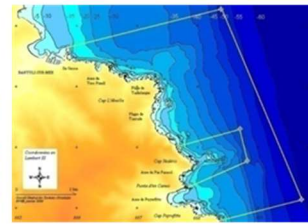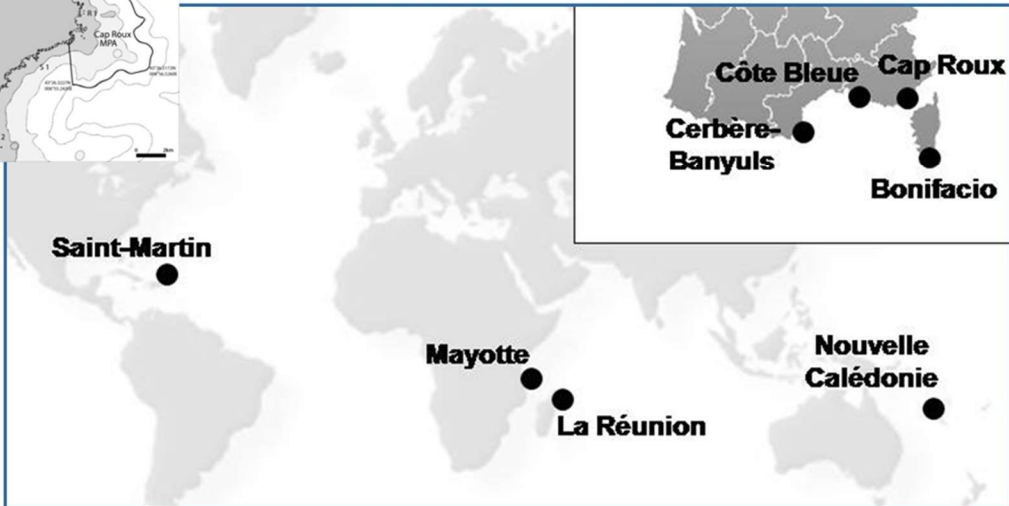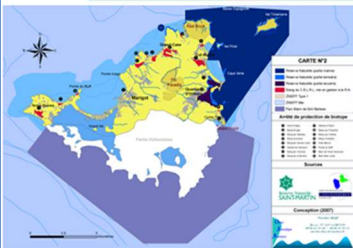

## Natural Reserve of Saint Martin (1998)

## Marine Reserves of Mayotte (1990) (2007)

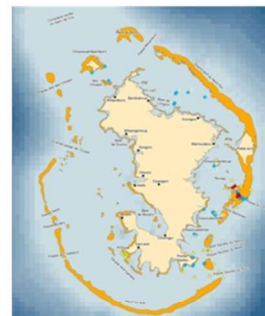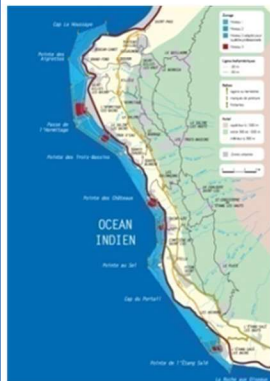

## Natural Reserve of la Réunion (2007)

## Marine Reserves of Nouméa, New Caledonia (1981 et 1989)

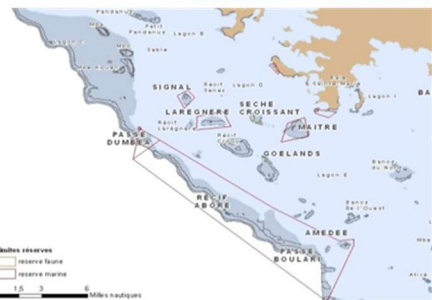

Supplement: Supplementary file 1 [file 25459607]
